# Supplementary material for: Luminescent lanthanide MOFs based on conjugated 1,1′-ethynebenzene-3,3′,5,5′-tetracarboxylate ligand: syntheses, structures and photoluminescent properties
Source: Royal Society of Chemistry journal article supplement (doi:10.1039/c4dt03794d), 2015-01-01
Supplement: c4dt03794d1.pdf [file c4dt03794d1.pdf]

*Supporting Information for*

**Luminescent lanthanide–MOFs with millisecond order lifetime based on conjugated 1, 1'-ethynebenzene–3, 3', 5, 5'-tetracarboxylate ligand: syntheses, structures and photoluminescent properties**

Lu Zhai,<sup>a,b</sup> Wen–Wei Zhang,<sup>\*b</sup> Xiao–Ming Ren<sup>\*a</sup> and Jin–Ling Zuo<sup>b</sup>

<sup>a</sup> State Key Laboratory of Materials–Oriented Chemical Engineering and College of Science, Nanjing Tech University, Nanjing 210009, P. R. China. E–mail: [xmren@njtech.edu.cn](mailto:xmren@njtech.edu.cn)

<sup>b</sup> State Key Laboratory of Coordination Chemistry, School of Chemistry and Chemical Engineering, Nanjing University, Nanjing 210093 P. R. China. E–mail: [wwzhang@nju.edu.cn](mailto:wwzhang@nju.edu.cn)

**Details for the preparation of 2–9**

[Ce<sub>2</sub>(EBTC)<sub>1.5</sub>(CH<sub>3</sub>OH)<sub>4</sub>].6H<sub>2</sub>O (**2**). An identical procedure with **1** was followed to prepare **2** except La(NO<sub>3</sub>)<sub>3</sub>.6H<sub>2</sub>O was replaced by Ce(NO<sub>3</sub>)<sub>3</sub>.6H<sub>2</sub>O. Colorless block-shaped crystals were achieved (yield: 72% based on Ce). Anal. Calcd for C<sub>31</sub>H<sub>29</sub>Ce<sub>2</sub>O<sub>18</sub>: C, 38.39; H, 2.99. Found: C, 38.16; H, 2.97. Selected IR data (KBr pellet, cm<sup>-1</sup>): 3438 (m), 3067 (w), 3004 (w), 2913 (w), 1626 (s), 1550 (s), 1436 (s), 1378 (s), 1018 (s), 786 (m), 717 (m).

[Pr<sub>2</sub>(EBTC)(CH<sub>3</sub>OH)<sub>4</sub>].6H<sub>2</sub>O (**3**). An identical procedure with **1** was followed to prepare **3** except La(NO<sub>3</sub>)<sub>3</sub>.6H<sub>2</sub>O was replaced by Pr(NO<sub>3</sub>)<sub>3</sub>.nH<sub>2</sub>O. Light-green crystals of **3** were obtained (yield: 68% based on Pr). Anal. Calcd for C<sub>31</sub>H<sub>29</sub>Pr<sub>2</sub>O<sub>18</sub>: C, 38.33; H, 3.01. Found: C, 38.23; H, 3.03. Selected IR data (KBr pellet, cm<sup>-1</sup>): 3369

(m), 3072 (w), 3005 (w), 2915 (w), 1628 (s), 1559 (s), 1436 (s), 1375 (s), 1004 (s), 786 (m), 717 (m).

**[Nd<sub>2</sub>(EBTC)(CH<sub>3</sub>OH)<sub>4</sub>·6H<sub>2</sub>O (4).** An identical procedure with **1** was followed to prepare **4** except La(NO<sub>3</sub>)<sub>3</sub>·6H<sub>2</sub>O was replaced by Nd(NO<sub>3</sub>)<sub>3</sub>·6H<sub>2</sub>O. Light-purple crystals of **4** were obtained (yield: 62% based on Nd). Anal. Calcd for C<sub>31</sub>H<sub>29</sub>Nd<sub>2</sub>O<sub>18</sub>: C, 38.07; H, 2.99. Found: C, 38.13; H, 2.94. Selected IR data (KBr pellet, cm<sup>-1</sup>): 3394 (m), 3073 (w), 3001 (w), 2918 (w), 1628 (s), 1559 (s), 1436 (s), 1375 (s), 1011 (s), 786 (m), 717 (m).

**[Sm<sub>2</sub>(EBTC)<sub>1.5</sub>(CH<sub>3</sub>OH)<sub>4</sub>·6H<sub>2</sub>O (5).** An identical procedure with **1** was followed to prepare **5** except La(NO<sub>3</sub>)<sub>3</sub>·6H<sub>2</sub>O was replaced by Sm(NO<sub>3</sub>)<sub>3</sub>·nH<sub>2</sub>O. Light-yellow crystals of **5** were obtained (yield: 60% based on Sm). Anal. Calcd for C<sub>31</sub>H<sub>29</sub>Sm<sub>2</sub>O<sub>18</sub>: C, 37.60; H, 2.95. Found: C, 37.34; H, 2.84. Selected IR data (KBr pellet, cm<sup>-1</sup>): 3438 (m), 3067 (w), 3004 (w), 2914 (w), 1626 (s), 1550 (s), 1436 (s), 1378 (s), 1018 (s), 786 (m), 717 (m).

**[Eu<sub>2</sub>(EBTC)(CH<sub>3</sub>OH)<sub>4</sub>·6H<sub>2</sub>O (6).** An identical procedure with **1** was followed to prepare **6** except La(NO<sub>3</sub>)<sub>3</sub>·6H<sub>2</sub>O was replaced by Eu(NO<sub>3</sub>)<sub>3</sub>·nH<sub>2</sub>O. Light-yellow crystals of **6** were obtained (yield: 65% based on Eu). Anal. Calcd for C<sub>31</sub>H<sub>29</sub>Eu<sub>2</sub>O<sub>18</sub>: C, 37.48; H, 2.92. Found: C, 37.18; H, 2.90. Selected IR data (KBr pellet, cm<sup>-1</sup>): 3470 (m), 3067 (w), 3003 (w), 2915 (w), 1626 (s), 1550 (s), 1436 (s), 1378 (s), 1018 (s), 786 (m), 717 (m).

**[Gd<sub>2</sub>(EBTC)(CH<sub>3</sub>OH)<sub>4</sub>·6H<sub>2</sub>O (7).** An identical procedure with **1** was followed to prepare **7** except La(NO<sub>3</sub>)<sub>3</sub>·6H<sub>2</sub>O was replaced by Gd(NO<sub>3</sub>)<sub>3</sub>·nH<sub>2</sub>O. Colorless crystals of **7** were obtained (yield: 60% based on Gd). Anal. Calcd for C<sub>31</sub>H<sub>29</sub>Gd<sub>2</sub>O<sub>18</sub>: C, 37.08; H, 2.89. Found: C, 36.75; H, 2.86. Selected IR data (KBr pellet, cm<sup>-1</sup>): 3421 (m), 3069 (w), 3004 (w), 2915 (w), 1626 (s), 1550 (s), 1440 (s), 1380 (s), 1014 (s), 786 (m), 717 (m).

**[Tb<sub>2</sub>(EBTC)(CH<sub>3</sub>OH)<sub>4</sub>·6H<sub>2</sub>O (8).** An identical procedure with **1** was followed to prepare **8** except La(NO<sub>3</sub>)<sub>3</sub>·6H<sub>2</sub>O was replaced by Tb(NO<sub>3</sub>)<sub>3</sub>·nH<sub>2</sub>O. Light-yellow crystals of **8** were obtained (yield: 66% based on Tb). Anal. Calcd for C<sub>31</sub>H<sub>29</sub>Tb<sub>2</sub>O<sub>18</sub>: C, 36.96; H, 2.88. Found: C, 36.63; H, 2.85. Selected IR data (KBr pellet, cm<sup>-1</sup>): 3457

(m), 3070 (w), 3004 (w), 2912 (w), 1628 (s), 1558 (s), 1436 (s), 1378 (s), 1018 (s), 786 (m), 717 (m).

**[Dy<sub>2</sub>(EBTC)(CH<sub>3</sub>OH)<sub>4</sub>·6H<sub>2</sub>O (9)].** An identical procedure with **1** was followed to prepare **9** except La(NO<sub>3</sub>)<sub>3</sub>·6H<sub>2</sub>O was replaced by Dy(NO<sub>3</sub>)<sub>3</sub>·nH<sub>2</sub>O. Colorless crystals of **9** were obtained (yield: 61% based on Dy). Anal. Calcd for C<sub>31</sub>H<sub>29</sub>Dy<sub>2</sub>O<sub>18</sub>: C, 36.70; H, 2.88. Found: C, 36.87; H, 2.81. Selected IR data (KBr pellet, cm<sup>-1</sup>): 3438 (m), 3067 (w), 3003 (w), 2915 (w), 1628 (s), 1560 (s), 1448 (s), 1378 (s), 1016 (s), 786 (m), 718 (m).

**Table S1** Cell Parameters of CompoundsC<sub>31</sub>H<sub>29</sub>Ln<sub>2</sub>O<sub>18</sub> (Ln = La (**1**), Ce (**2**), Pr (**3**), Nd (**4**), Sm (**5**), Gd (**7**), Dy (**9**))Space group: *P2(1)/n*

| Compound | Ln | a (Å)       | b(Å)        | c(Å)        | β / Å      | V(Å <sup>3</sup> ) |
|----------|----|-------------|-------------|-------------|------------|--------------------|
| <b>1</b> | La | 14.674(4)   | 16.331(4)   | 21.113(5)   | 105.917(4) | 4866(2)            |
| <b>2</b> | Ce | 14.651(4)   | 16.444(5)   | 20.994(6)   | 106.051(4) | 4861(2)            |
| <b>3</b> | Pr | 14.578(3)   | 16.669(4)   | 19.790(4)   | 107.057(3) | 4597.2(18)         |
| <b>4</b> | Nd | 14.5952(12) | 16.7329(11) | 19.5713(14) | 107.344(3) | 4562.4(6)          |
| <b>5</b> | Sm | 14.4388(18) | 16.4128(19) | 19.3310(12) | 107.606(3) | 4366.5(8)          |
| <b>7</b> | Gd | 14.41(4)    | 17.08(4)    | 19.55(5)    | 107.72(4)  | 4579(20)           |
| <b>9</b> | Dy | 14.4821(18) | 16.7137(19) | 19.2130(12) | 108.039(3) | 4421.9(8)          |

**Table S2** Selected bond angles (°) in **4**, **5** and **9**

| <b>4</b>    |            |             |            |
|-------------|------------|-------------|------------|
| O6–Nd1–O14  | 82.82(15)  | O6–Nd1–O10  | 139.68(15) |
| O14–Nd1–O10 | 129.59(15) | O6–Nd1–O13  | 78.62(17)  |
| O14–Nd1–O13 | 153.69(16) | O10–Nd1–O13 | 75.68(16)  |
| O6–Nd1–O1   | 80.90(15)  | O14–Nd1–O1  | 87.32(16)  |
| O10–Nd1–O1  | 78.06(15)  | O13–Nd1–O1  | 107.75(16) |
| O6–Nd1–O4   | 127.69(16) | O14–Nd1–O4  | 88.42(15)  |
| O10–Nd1–O4  | 82.13(15)  | O13–Nd1–O4  | 88.33(16)  |
| O1–Nd1–O4   | 150.23(13) | O6–Nd1–O3   | 75.90(16)  |
| O14–Nd1–O3  | 79.63(16)  | O10–Nd1–O3  | 126.89(16) |
| O13–Nd1–O3  | 77.88(16)  | O1–Nd1–O3   | 154.56(14) |
| O4–Nd1–O3   | 51.80(14)  | O6–Nd1–O9   | 148.73(16) |
| O14–Nd1–O9  | 75.81(15)  | O10–Nd1–O9  | 53.89(14)  |
| O13–Nd1–O9  | 128.12(16) | O1–Nd1–O9   | 75.61(13)  |
| O4–Nd1–O9   | 74.78(14)  | O3–Nd1–O9   | 121.19(14) |
| O2–Nd2–O15  | 78.03(15)  | O2–Nd2–O5   | 83.68(17)  |
| O15–Nd2–O5  | 115.05(15) | O2–Nd2–O8   | 129.29(16) |
| O15–Nd2–O8  | 79.44(16)  | O5–Nd2–O8   | 146.93(17) |
| O2–Nd2–O16  | 136.18(16) | O15–Nd2–O16 | 75.88(16)  |
| O5–Nd2–O16  | 76.43(18)  | O8–Nd2–O16  | 79.06(18)  |
| O2–Nd2–O11  | 79.91(16)  | O15–Nd2–O11 | 150.43(16) |
| O5–Nd2–O11  | 81.54(16)  | O8–Nd2–O11  | 100.03(17) |
| O16–Nd2–O11 | 133.40(17) | O2–Nd2–O12  | 131.26(16) |
| O15–Nd2–O12 | 150.50(16) | O5–Nd2–O12  | 77.16(16)  |

|             |            |             |            |
|-------------|------------|-------------|------------|
| O8–Nd2–O12  | 77.64(16)  | O16–Nd2–O12 | 81.72(16)  |
| O11–Nd2–O12 | 53.36(16)  | O2–Nd2–O7   | 81.72(15)  |
| O15–Nd2–O7  | 80.56(15)  | O5–Nd2–O7   | 155.81(15) |
| O8–Nd2–O7   | 50.01(15)  | O16–Nd2–O7  | 126.93(17) |
| O11–Nd2–O7  | 76.99(15)  | O12–Nd2–O7  | 98.37(16)  |
| <b>5</b>    |            |             |            |
| O6–Sm1–O10  | 140.0(2)   | O6–Sm1–O14  | 82.9(2)    |
| O10–Sm1–O14 | 129.1(2)   | O6–Sm1–O13  | 78.9(2)    |
| O10–Sm1–O13 | 75.8(2)    | O14–Sm1–O13 | 154.0(2)   |
| O6–Sm1–O1   | 80.9(2)    | O10–Sm1–O1  | 78.0(2)    |
| O14–Sm1–O1  | 87.6(2)    | O13–Sm1–O1  | 107.6(2)   |
| O6–Sm1–O4   | 128.0(2)   | O10–Sm1–O4  | 81.7(2)    |
| O14–Sm1–O4  | 88.4(2)    | O14–Sm1–O4  | 88.2(2)    |
| O1–Sm1–O4   | 150.00(18) | O6–Sm1–O3   | 75.8(2)    |
| O10–Sm1–O3  | 126.8(2)   | O14–Sm1–O3  | 79.9(2)    |
| O13–Sm1–O3  | 77.7(2)    | O1–Sm1–O3   | 154.7(2)   |
| O4–Sm1–O3   | 52.17(19)  | O6–Sm1–O9   | 148.3(2)   |
| O10–Sm1–O9  | 54.0(2)    | O14–Sm1–O9  | 75.3(2)    |
| O13–Sm1–O9  | 128.4(2)   | O1–Sm1–O9   | 75.52(18)  |
| O4–Sm1–O9   | 74.71(19)  | O3–Sm1–O9   | 121.36(19) |
| O2–Sm2–O15  | 78.4(2)    | O2–Sm2–O8   | 129.9(2)   |
| O15–Sm2–O8  | 79.7(2)    | O2–Sm2–O5   | 83.2(2)    |
| O15–Sm2–O5  | 114.5(2)   | O8–Sm2–O5   | 146.8(2)   |
| O2–Sm2–O11  | 79.4(2)    | O15–Sm2–O11 | 150.5(2)   |
| O8–Sm2–O11  | 100.4(2)   | O5–Sm2–O11  | 81.7(2)    |
| O2–Sm2–O16  | 136.5(2)   | O15–Sm2–O16 | 75.7(2)    |
| O8–Sm2–O16  | 78.5(2)    | O5–Sm2–O16  | 76.6(2)    |
| O11–Sm2–O15 | 133.6(2)   | O2–Sm2–O12  | 131.3(2)   |
| O15–Sm2–O12 | 150.2(2)   | O8–Sm2–O12  | 77.4(2)    |
| O5–Sm2–O12  | 77.3(2)    | O11–Sm2–O12 | 54.1(2)    |
| O16–Sm2–O12 | 81.1(2)    | O2–Sm2–O7   | 81.5(2)    |
| O15–Sm2–O7  | 81.0(2)    | O8–Sm2–O7   | 50.8(2)    |
| O5–Sm2–O7   | 155.5(2)   | O11–Sm2–O7  | 76.8(2)    |
| O16–Sm2–O7  | 127.2(2)   | O12–Sm2–O7  | 98.8(2)    |
| <b>9</b>    |            |             |            |
| O6–Dy1–O1   | 80.86(12)  | O6–Dy1–O13  | 78.80(14)  |
| O1–Dy1–O13  | 106.76(12) | O6–Dy1–O14  | 82.39(13)  |
| O1–Dy1–O14  | 88.33(13)  | O13–Dy1–O14 | 153.49(14) |
| O6–Dy1–O10  | 139.68(13) | O1–Dy1–O10  | 77.82(12)  |
| O13–Dy1–O10 | 75.23(14)  | O14–Dy1–O10 | 130.24(13) |
| O6–Dy1–O14  | 127.91(13) | O1–Dy1–O4   | 150.00(11) |
| O13–Dy1–O4  | 89.28(12)  | O14–Dy1–O4  | 87.69(12)  |
| O10–Dy1–O4  | 82.22(13)  | O6–Dy1–O3   | 75.49(13)  |
| O1–Dy1–O3   | 154.21(12) | O13–Dy1–O3  | 78.75(13)  |

|             |            |             |            |
|-------------|------------|-------------|------------|
| O14–Dy1–O3  | 78.58(13)  | O10–Dy1–O3  | 127.42(13) |
| O4–Dy1–O3   | 52.43(12)  | O6–Dy1–O9   | 148.62(13) |
| O1–Dy1–O9   | 76.02(11)  | O13–Dy1–O9  | 128.09(14) |
| O14–Dy1–O9  | 76.08(13)  | O10–Dy1–O9  | 54.26(13)  |
| O4–Dy1–O9   | 74.17(12)  | O3–Dy1–O9   | 121.08(11) |
| O2–Dy2–O5   | 82.95(14)  | O2–Dy2–O8   | 130.47(13) |
| O5–Dy2–O8   | 146.54(14) | O2–Dy2–O15  | 78.05(13)  |
| O5–Dy2–O15  | 114.22(13) | O8–Dy2–O15  | 79.76(13)  |
| O2–Dy2–O16  | 135.30(13) | O5–Dy2–O16  | 76.92(14)  |
| O8–Dy2–O16  | 78.13(14)  | O15–Dy2–O16 | 74.72(13)  |
| O2–Dy2–O11  | 80.48(14)  | O5–Dy2–O11  | 81.64(13)  |
| O8–Dy2–O11  | 100.32(13) | O15–Dy2–O11 | 151.20(13) |
| O16–Dy2–O11 | 133.82(14) | O2–Dy2–O12  | 131.64(14) |
| O5–Dy2–O12  | 77.84(14)  | O8–Dy2–O12  | 77.04(13)  |
| O15–Dy2–O12 | 150.16(13) | O16–Dy2–O12 | 82.32(14)  |
| O11–Dy2–O12 | 53.19(13)  | O2–Dy2–O7   | 82.59(12)  |
| O5–Dy2–O7   | 155.87(13) | O8–Dy2–O7   | 50.53(13)  |
| O15–Dy2–O7  | 81.38(13)  | O16–Dy2–O7  | 126.43(13) |
| O11–Dy2–O7  | 77.00(13)  | O12–Dy2–O7  | 97.78(13)  |

**Table S3** Crystallographic data and structural refinements for **1** and **3**

| Compound                                                                                 | <b>1</b>                                                        | <b>3</b>                                                        |
|------------------------------------------------------------------------------------------|-----------------------------------------------------------------|-----------------------------------------------------------------|
| Formula                                                                                  | C <sub>31</sub> H <sub>29</sub> La <sub>2</sub> O <sub>18</sub> | C <sub>31</sub> H <sub>29</sub> Pr <sub>2</sub> O <sub>18</sub> |
| Formula weight                                                                           | 966.35                                                          | 971.33                                                          |
| Temperature (K)                                                                          | 296(2)                                                          | 296(2)                                                          |
| Wavelength (Å)                                                                           | 0.71073                                                         | 0.71073                                                         |
| Crystal size /mm                                                                         | 0.20×0.20×0.15                                                  | 0.19×0.17×0.14                                                  |
| Crystal system                                                                           | Monoclinic                                                      | Monoclinic                                                      |
| Space group                                                                              | <i>P2(1)/n</i>                                                  | <i>P2(1)/n</i>                                                  |
| <i>a</i> / Å                                                                             | 14.674(4)                                                       | 14.578(3)                                                       |
| <i>b</i> / Å                                                                             | 16.331(4)                                                       | 16.669(4)                                                       |
| <i>c</i> / Å                                                                             | 21.113(5)                                                       | 19.790(4)                                                       |
| <i>β</i> / Å                                                                             | 105.917(4)                                                      | 107.057(3)                                                      |
| <i>V</i> / Å <sup>3</sup>                                                                | 4866(2)                                                         | 4597.2(18)                                                      |
| <i>Z</i>                                                                                 | 4                                                               | 4                                                               |
| <i>F</i> (000)                                                                           | 1892                                                            | 1892                                                            |
| <i>θ</i> <sub>min,max</sub> /°                                                           | 1.51–25.00                                                      | 1.90–26.00                                                      |
| GOF                                                                                      | 1.166                                                           | 1.042                                                           |
| <i>R</i> <sub>1</sub> , <i>wR</i> <sub>2</sub> [ <i>I</i> > 2σ( <i>I</i> )] <sup>a</sup> | 0.2050, 0.4868                                                  | 0.1287, 0.3054                                                  |

<sup>a</sup>  $R = \frac{\sum |F_o| - |F_c|}{\sum |F_o|}$ ;  $wR_2 = \left\{ \frac{\sum [w(F_o^2 - F_c^2)^2]}{\sum (w(F_o^2)^2)} \right\}^{1/2}$

**Table S4** Selected bond lengths (Å) and angles (°) in **1** and **3**

| <b>1</b>     |           |             |           |             |           |
|--------------|-----------|-------------|-----------|-------------|-----------|
| bond lengths |           |             |           |             |           |
| La1–O10      | 2.62(3)   | La1–O5      | 2.56(3)   | La1–O1      | 2.58(3)   |
| La1–O6       | 2.69(3)   | La1–O8      | 2.63(2)   | La1–O13     | 2.58(4)   |
| La1–O4       | 2.43(2)   | La1–O14     | 2.51(3)   | La2–O7      | 2.43(2)   |
| La2–O3       | 2.47(3)   | La2–O12     | 2.50(4)   | La2–O11     | 2.48(3)   |
| La2–O16      | 2.69(2)   | La2–O15     | 2.59(3)   | La2–O2      | 2.62(2)   |
| La2–O9       | 2.60(3)   |             |           |             |           |
| bond angles  |           |             |           |             |           |
| O4–La1–O14   | 84.5(9)   | O4–La1–O5   | 123.5(8)  | O14–La1–O5  | 146.4(9)  |
| O4–La1–O1    | 82.4(10)  | O14–La1–O1  | 137.8(10) | O5–La1–O1   | 70.3(10)  |
| O4–La1–O13   | 153.6(8)  | O14–La1–O13 | 77.6(9)   | O5–La1–O13  | 69.4(9)   |
| O1–La1–O13   | 123.7(10) | O4–La1–O10  | 74.2(8)   | O14–La1–O10 | 142.9(9)  |
| O5–La1–O10   | 50.3(8)   | O1–La1–O10  | 69.5(10)  | O13–La1–O10 | 109.5(8)  |
| O4–La1–O8    | 77.9(8)   | O14–La1–O8  | 73.1(8)   | O5–La1–O8   | 126.7(8)  |
| O1–La1–O8    | 65.0(10)  | O13–La1–O8  | 114.4(8)  | O10–La1–O8  | 128.9(8)  |
| O6–La1–O4    | 127.0(8)  | O14–La1–O6  | 80.0(8)   | O5–La1–O6   | 94.0(8)   |
| O1–La1–O6    | 76.5(10)  | O13–La1–O6  | 69.0(8)   | O10–La1–O6  | 137.0(8)  |
| O8–La1–O6    | 49.0(8)   | O7–La2–O3   | 80.1(9)   | O7–La2–O11  | 152.6(9)  |
| O3–La2–O11   | 90.8(9)   | O7–La2–O12  | 94.4(10)  | O3–La2–O12  | 144.2(11) |
| O11–La2–O1   | 78.1(10)  | O7–La2–O15  | 85.4(8)   | O3–La2–O15  | 77.8(9)   |
| <b>2</b>     |           |             |           |             |           |
| O11–La2–O1   | 118.0(9)  | O12–La2–O15 | 137.4(10) | O7–La2–O9   | 70.8(8)   |
| <b>5</b>     |           |             |           |             |           |
| O3–La2–O9    | 138.6(9)  | O11–La2–O9  | 127.8(9)  | O12–La2–O9  | 68.6(10)  |
| O15–La2–O9   | 71.3(8)   | O7–La2–O2   | 120.2(8)  | O3–La2–O2   | 141.5(8)  |
| O11–La2–O2   | 82.6(8)   | O12–La2–O2  | 71.2(10)  | O15–La2–O2  | 72.4(8)   |
| O9–La2–O2    | 49.6(7)   | O7–La2–O16  | 128.3(7)  | O3–La2–O16  | 70.7(8)   |
| O11–La2–O1   | 70.7(8)   | O12–La2–O16 | 133.5(9)  | O15–La2–O16 | 47.9(8)   |
| <b>6</b>     |           |             |           |             |           |
| O9–La2–O16   | 105.3(7)  | O2–La2–O16  | 71.4(7)   |             |           |
| <b>3</b>     |           |             |           |             |           |
| bond lengths |           |             |           |             |           |
| Pr1–O1       | 2.390(11) | Pr1–O3      | 2.581(13) | Pr1–O4      | 2.481(14) |
| Pr1–O6       | 2.489(17) | Pr2–O9      | 2.465(14) | Pr2–O10     | 2.592(11) |
| Pr2–O13      | 2.343(13) | Pr2–O14     | 2.550(14) | Pr1–O2      | 2.47(3)   |
| Pr1–O7       | 2.575(15) | Pr1–O8      | 2.432(13) | Pr2–O16     | 2.39(2)   |
| Pr1–O5       | 2.483(18) | Pr2–O11     | 2.397(12) | Pr2–O15     | 2.499(13) |
| Pr2–O12      | 2.35(2)   |             |           |             |           |
| bond angles  |           |             |           |             |           |
| O1–Pr1–O8    | 84.1(4)   | O1–Pr1–O2   | 81.4(8)   | O8–Pr1–O2   | 131.8(12) |
| O1–Pr1–O4    | 128.8(4)  | O8–Pr1–O4   | 143.6(5)  | O2–Pr1–O4   | 75.3(11)  |
| O1–Pr1–O5    | 151.2(6)  | O8–Pr1–O5   | 83.5(7)   | O2–Pr1–O5   | 87.7(9)   |

|             |           |             |          |             |          |
|-------------|-----------|-------------|----------|-------------|----------|
| O4-Pr1-O5   | 72.7(6)   | O1-Pr1-O6   | 79.3(6)  | O8-Pr1-O6   | 79.5(7)  |
| O2-Pr1-O6   | 140.8(10) | O4-Pr1-O6   | 90.9(7)  | O5-Pr1-O6   | 123.5(7) |
| O1-Pr1-O7   | 127.5(4)  | O8-Pr1-O7   | 72.8(5)  | O2-Pr1-O7   | 147.3(9) |
| O4-Pr1-O7   | 74.0(6)   | O5-Pr1-O7   | 72.6(6)  | O6-Pr1-O7   | 50.9(5)  |
| O1-Pr1-O3   | 77.7(4)   | O8-Pr1-O3   | 148.2(6) | O2-Pr1-O3   | 71.0(11) |
| O4-Pr1-O3   | 51.8(4)   | O5-Pr1-O3   | 123.7(6) | O6-Pr1-O3   | 71.7(7)  |
| O7-Pr1-O3   | 98.1(6)   | O13-Pr2-O12 | 85.1(8)  | O13-Pr2-O16 | 76.9(10) |
| O12-Pr2-O16 | 154.5(9)  | O13-Pr2-O11 | 80.0(5)  | O12-Pr2-O11 | 88.0(7)  |
| O16-Pr2-O11 | 106.2(10) | O13-Pr2-O9  | 139.1(7) | O12-Pr2-O9  | 129.8(6) |
| O16-Pr2-O9  | 74.3(8)   | O11-Pr2-O9  | 80.8(5)  | O13-Pr2-O15 | 128.9(5) |
| O12-Pr2-O15 | 88.6(9)   | O16-Pr2-O15 | 88.8(11) | O11-Pr2-O15 | 150.4(4) |
| O9-Pr2-O15  | 79.0(6)   | O13-Pr2-O14 | 78.0(5)  | O12-Pr2-O14 | 81.5(9)  |
| O16-Pr2-O14 | 77.3(10)  | O11-Pr2-O14 | 156.3(5) | O 9-Pr2-O14 | 122.1(6) |
| O15-Pr2-O14 | 51.0(4)   | O13-Pr2-O10 | 151.6(5) | O12-Pr2-O10 | 78.8(6)  |
| O16-Pr2-O10 | 124.6(8)  | O11-Pr2-O10 | 76.2(4)  | O 9-Pr2-O10 | 51.0(4)  |
| O15-Pr2-O10 | 74.3(4)   | O14-Pr2-O10 | 121.8(4) |             |          |

---



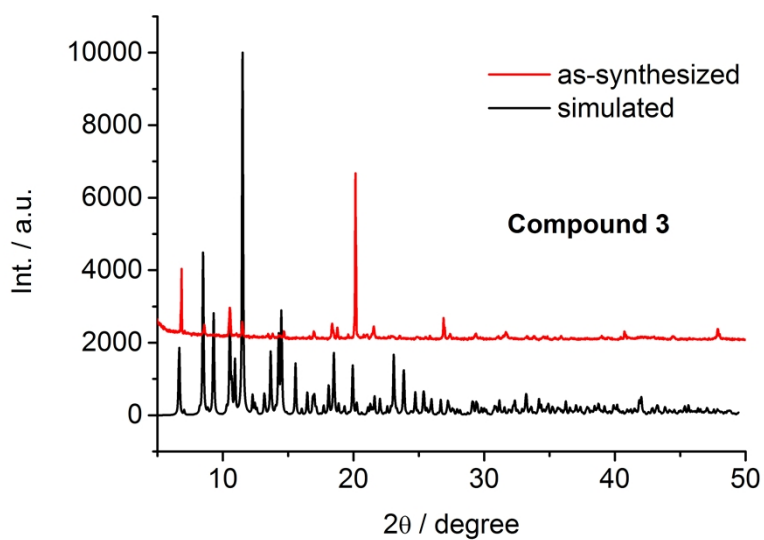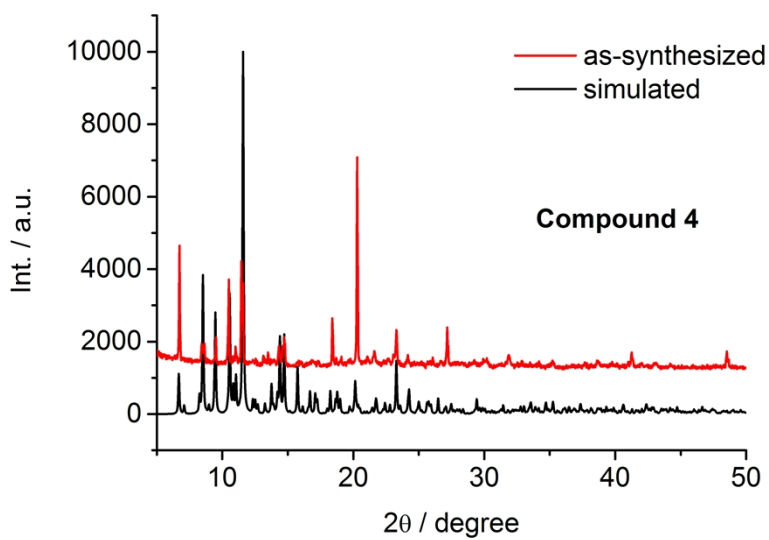

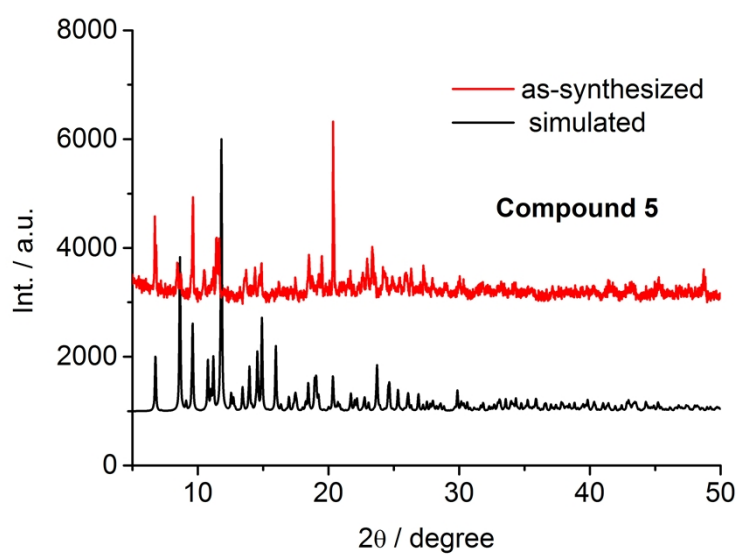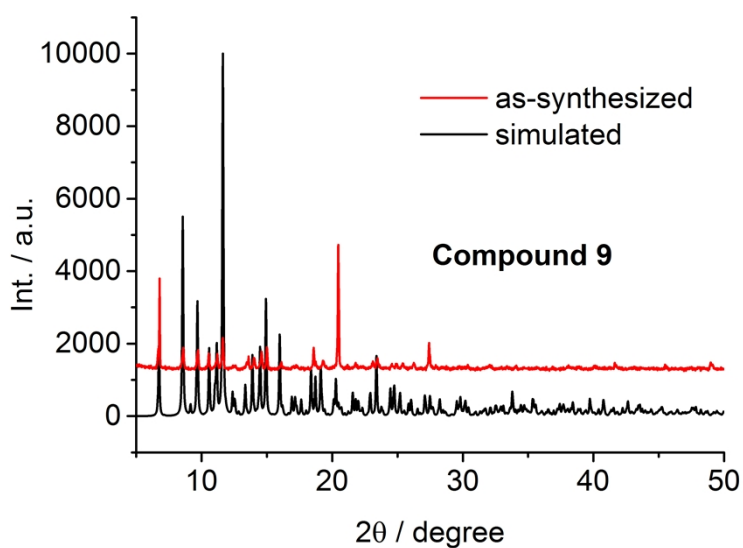

**Fig. S1** PXRD patterns of simulated from the X-ray single-crystal structures and as-synthesized samples of **3**, **4**, **5** and **9**.

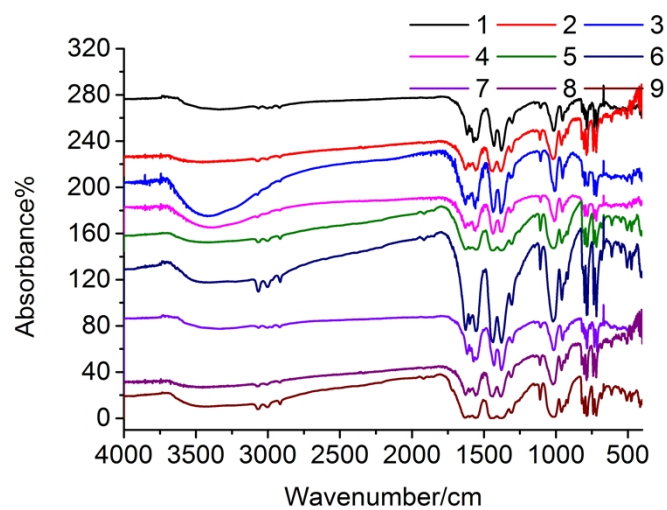

**Fig. S2** The IR spectra of **1–9** recorded from a KBr pellet.

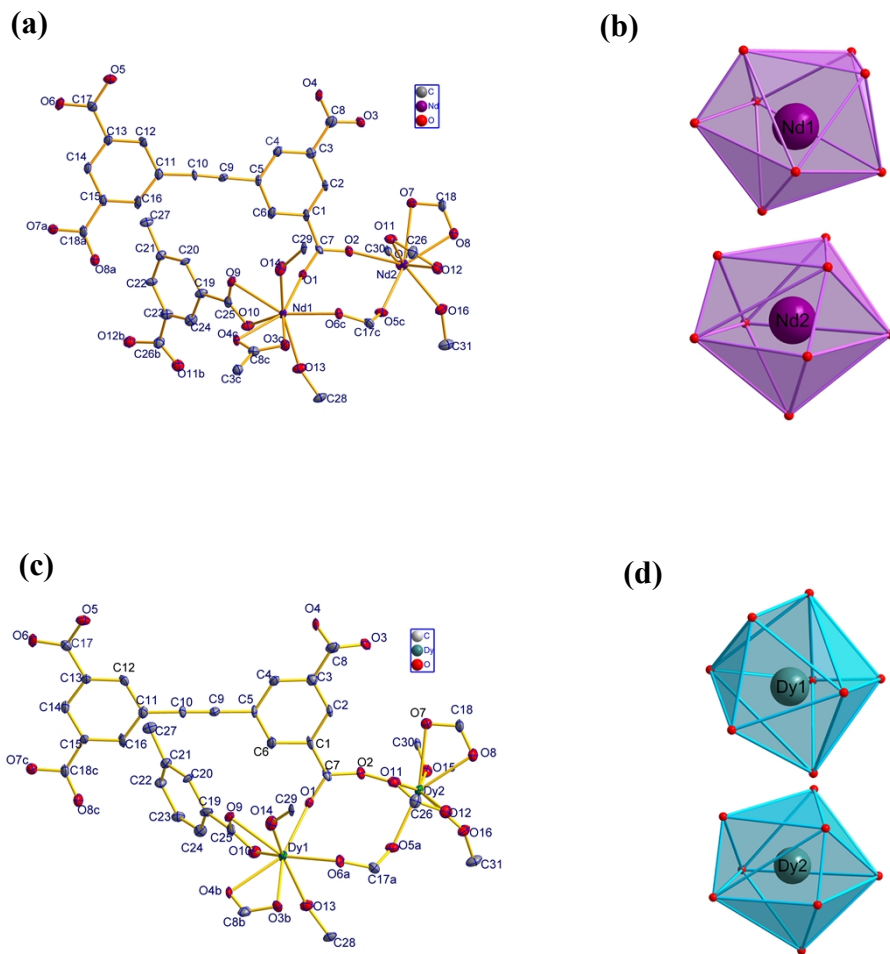

**Fig. S3** (a) Coordination environments of  $\text{Nd}^{3+}$  ions with the H atoms omitted for clarity; symmetry codes: a =  $-1+x, y, z$ ; b =  $1.5-x, 0.5+y, 0.5-z$ ; c =  $0.5+x, 0.5-y, -0.5+z$ ; (b) coordination polyhedron of  $\text{Nd}^{3+}$  ions; (c) coordination environments of  $\text{Dy}^{3+}$  ions with the H atoms omitted for clarity; symmetry codes: a =  $0.5+x, 0.5-y, -0.5+z$ ; b =  $-0.5+x, 0.5-y, -0.5+z$ ; c =  $-1+x, y, z$ ; (d) coordination polyhedron of  $\text{Dy}^{3+}$  ions.

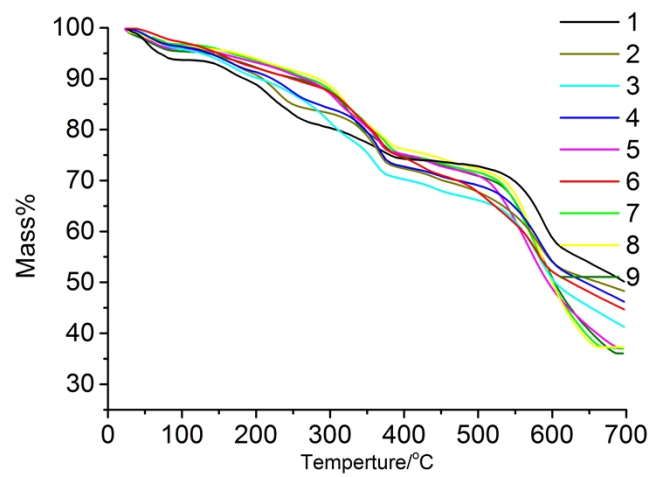

**Fig. S4** The TG curves of **1-9**.

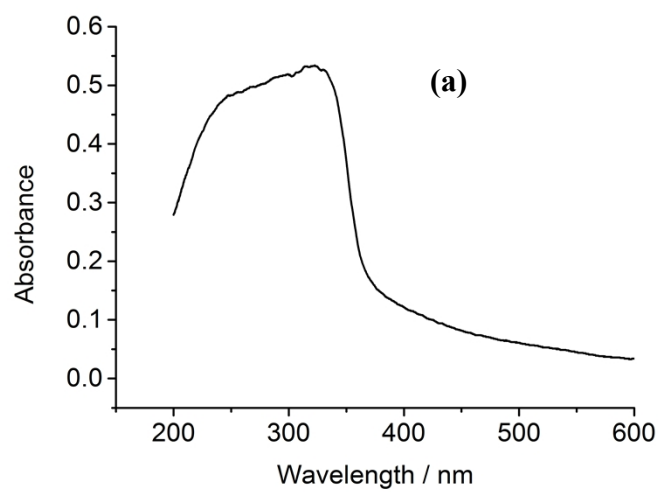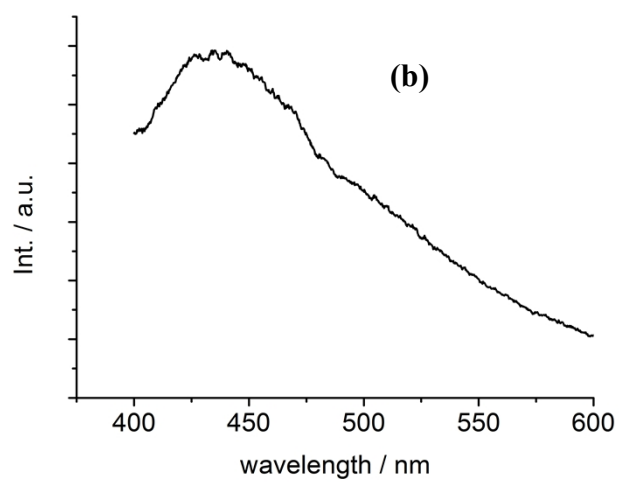

**Fig. S5** (a) UV-vis absorption and (b) emission spectra of H<sub>4</sub>EBTC in solid state at room temperature.

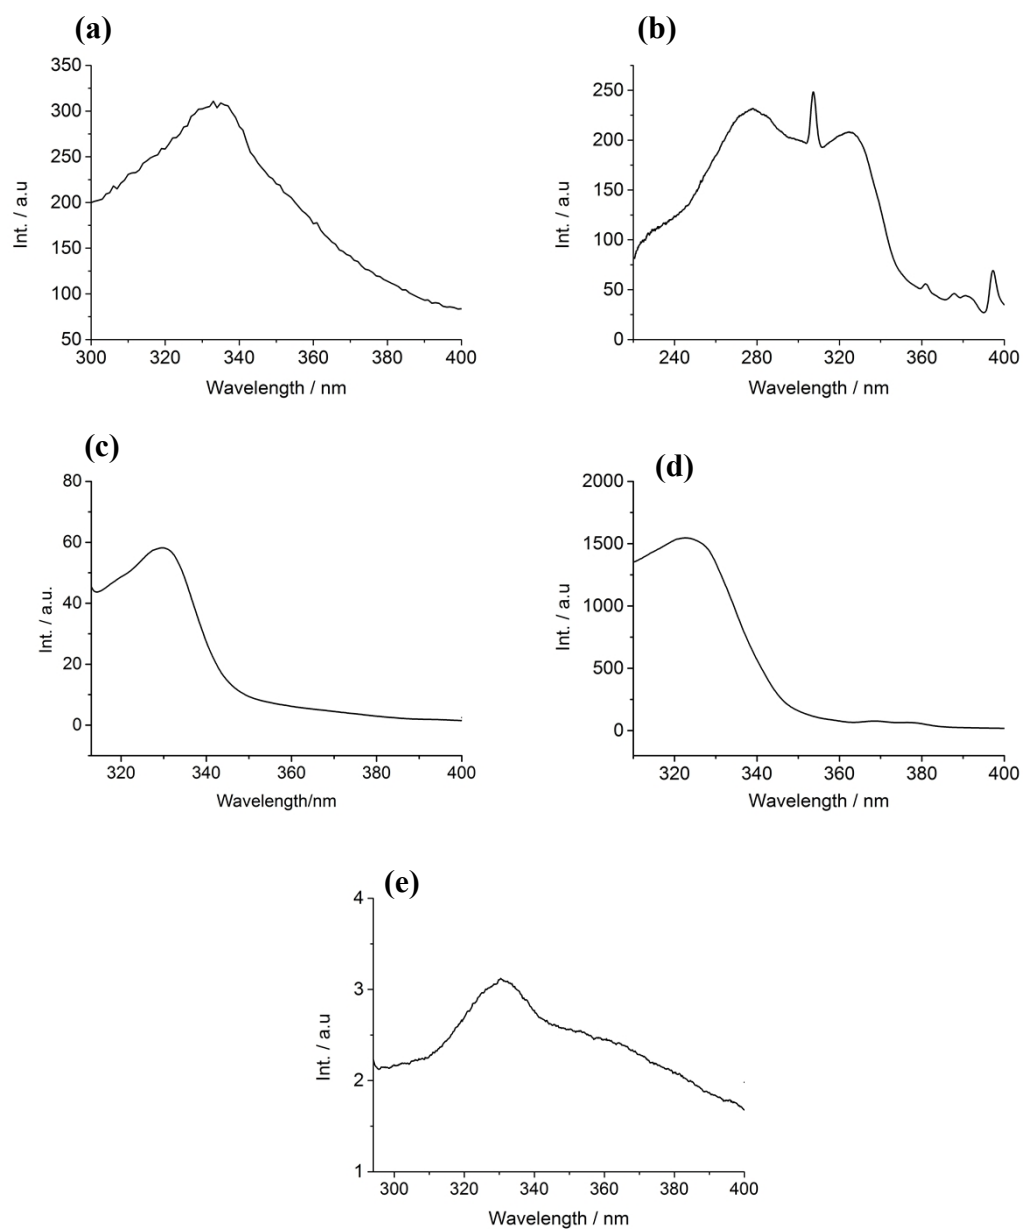

**Fig. S6** The excitation spectra of **1** (a), **6** (b), **7** (c), **8** (d), **9** (e) in solid state at room temperature, monitored at 556 nm, 618 nm, 556 nm, 546 nm and 575 nm respectively.
